# Supplementary material
Source: publisher figshare collection journal article supplement (https://sage.figshare.com/ndownloader/files/35101188)
Supplement: Supplementary file 1 [file 35101188]

## Appendix A.

### Diagnostic Coding for the Sample

| <i>Diagnostic Coding used for Sample Inclusion Criteria</i>                                                                                                                                                                                                                                                                                                                                                                                                                                                                                                                                                                             |                                                                                          |
|-----------------------------------------------------------------------------------------------------------------------------------------------------------------------------------------------------------------------------------------------------------------------------------------------------------------------------------------------------------------------------------------------------------------------------------------------------------------------------------------------------------------------------------------------------------------------------------------------------------------------------------------|------------------------------------------------------------------------------------------|
| M17                                                                                                                                                                                                                                                                                                                                                                                                                                                                                                                                                                                                                                     | OA of knee                                                                               |
| M17.0                                                                                                                                                                                                                                                                                                                                                                                                                                                                                                                                                                                                                                   | M17.0 Bilateral primary OA of knee                                                       |
| M17.1                                                                                                                                                                                                                                                                                                                                                                                                                                                                                                                                                                                                                                   | Unilateral primary OA of knee                                                            |
| M17.10                                                                                                                                                                                                                                                                                                                                                                                                                                                                                                                                                                                                                                  | Unilateral primary OA, unspecified knee                                                  |
| M17.11                                                                                                                                                                                                                                                                                                                                                                                                                                                                                                                                                                                                                                  | Unilateral primary OA, right knee                                                        |
| M17.12                                                                                                                                                                                                                                                                                                                                                                                                                                                                                                                                                                                                                                  | Unilateral primary OA, left knee                                                         |
| M17.2                                                                                                                                                                                                                                                                                                                                                                                                                                                                                                                                                                                                                                   | Bilateral post-traumatic OA of knee                                                      |
| M17.3                                                                                                                                                                                                                                                                                                                                                                                                                                                                                                                                                                                                                                   | Unilateral post-traumatic OA of knee                                                     |
| M17.30                                                                                                                                                                                                                                                                                                                                                                                                                                                                                                                                                                                                                                  | Unilateral post-traumatic OA, unspecified knee                                           |
| M17.31                                                                                                                                                                                                                                                                                                                                                                                                                                                                                                                                                                                                                                  | Unilateral post-traumatic OA, right knee                                                 |
| M17.32                                                                                                                                                                                                                                                                                                                                                                                                                                                                                                                                                                                                                                  | Unilateral post-traumatic OA, left knee                                                  |
| M17.4                                                                                                                                                                                                                                                                                                                                                                                                                                                                                                                                                                                                                                   | Other bilateral secondary OA of knee                                                     |
| M17.5                                                                                                                                                                                                                                                                                                                                                                                                                                                                                                                                                                                                                                   | Other unilateral secondary OA of knee                                                    |
| M17.9                                                                                                                                                                                                                                                                                                                                                                                                                                                                                                                                                                                                                                   | OA of knee, unspecified                                                                  |
| 715.16                                                                                                                                                                                                                                                                                                                                                                                                                                                                                                                                                                                                                                  | Osteoarthritis, localized, primary, lower leg (ICD 9 if collected prior to October 2015) |
| <i>Diagnostic Coding used for Sample Exclusion Criteria</i>                                                                                                                                                                                                                                                                                                                                                                                                                                                                                                                                                                             |                                                                                          |
| V43.65, Z96.659, Z47.1, Z96.653, Z96.651, Z96.652                                                                                                                                                                                                                                                                                                                                                                                                                                                                                                                                                                                       | knee replacement                                                                         |
| <i>Diagnostic Coding used for Sample Comorbidities</i>                                                                                                                                                                                                                                                                                                                                                                                                                                                                                                                                                                                  |                                                                                          |
| F28, F31.0, F31.30, F31.31, F31.32, F31.4, F31.5, F31.60, F31.61, F31.62, F31.63, F31.64, F31.70, F31.74, F31.75, F31.76, F31.77, F31.78, F31.81, F32.0, F32.1, F32.2, F32.3, F32.4, F32.5, F32.8, F32.9, F33.0, F33.1, F33.2, F33.3, F33.9, F33.40, F33.41, F33.42, F34.8, F43.21, F43.29, F48.8, F91.1 296.20, 296.21, 296.22, 296.23, 296.24, 296.25, 296.26, 296.30, 296.31, 296.32, 296.33, 296.34, 296.35, 296.36, 296.45, 296.46, 296.5, 296.50, 296.51, 296.52, 296.53, 296.54, 296.55, 296.56, 296.60, 296.61, 296.62, 296.63, 296.64, 296.65, 296.66, 296.82, 296.99, 298.0, 300.01, 300.02, 300.4, 309.0, 309.1, 309.28, 311 | Depression/Anxiety                                                                       |
| 250.00, E11.9                                                                                                                                                                                                                                                                                                                                                                                                                                                                                                                                                                                                                           | Diabetes                                                                                 |
| 401.9, I10, I11, I12, I13, I15                                                                                                                                                                                                                                                                                                                                                                                                                                                                                                                                                                                                          | Hypertension                                                                             |
| 429.2, I25.10                                                                                                                                                                                                                                                                                                                                                                                                                                                                                                                                                                                                                           | Vascular Disease                                                                         |
| 496, J44.9                                                                                                                                                                                                                                                                                                                                                                                                                                                                                                                                                                                                                              | COPD                                                                                     |
